# Supplementary material for: Insight into the Roles of Metal Loading on CO2 Photocatalytic Reduction Behaviors of TiO2
Source: MDPI journal article supplement (doi:10.3390/nano12030474), 2022-01-29
Supplement: s1 [file s1]

### Supplement information

**Table S1.** The actual amount of the metals in the samples at the theoretical content of 0.1% wt. measured by ICP-OES

| Samples             | %metal from ICP-OES |
|---------------------|---------------------|
| Pt-TiO <sub>2</sub> | 0.10                |
| Pd-TiO <sub>2</sub> | 0.07                |
| Ni-TiO <sub>2</sub> | 0.10                |
| Cu-TiO <sub>2</sub> | 0.09                |

**Table S2.** Edge energy of the samples and the standards obtained from XANES spectra

| samples                           | Edge energy (eV) |
|-----------------------------------|------------------|
| Pt foil                           | 11567.9          |
| PtO <sub>2</sub>                  | 11567.4          |
| H <sub>2</sub> Cl <sub>6</sub> Pt | 11567.5          |
| 0.1%Pt/TiO <sub>2</sub> (fresh)   | 11568.1          |
| 0.1%Pt/TiO <sub>2</sub> (spent)   | 11568.2          |
| Pd foil                           | 3176.1           |
| PdO                               | 3174.6           |
| PdCOCl <sub>2</sub>               | 3175.4           |
| 0.1%Pd/TiO <sub>2</sub> (fresh)   | 3175.4           |
| 0.1%Pd/TiO <sub>2</sub> (spent)   | 3175.5           |
| Ni foil                           | 8340.9           |
| NiO                               | 8350.4           |
| Ni(OH) <sub>2</sub>               | 8349.9           |
| Ni(NO <sub>3</sub> ) <sub>2</sub> | 8350.4           |
| 0.1%Ni/TiO <sub>2</sub> (fresh)   | 8341.2           |
| 0.1%Ni/TiO <sub>2</sub> (spent)   | 8339.9           |
| Cu foil                           | 8993.7           |
| CuO                               | 8983.4           |
| Cu <sub>2</sub> O                 | 8982.0           |
| 0.1%Cu/TiO <sub>2</sub> (fresh)   | 8995.4           |
| 0.1%Cu/TiO <sub>2</sub> (spent)   | 8995.8           |

**Table S3** Element of C, H, and N over Pt loaded TiO<sub>2</sub>

| Element | Composition (%) |
|---------|-----------------|
| C       | 0.44            |
| H       | 0               |
| N       | 0.29            |

**Table S4** Calculated properties of adsorption energy, O—C—O angle, CO<sub>2</sub> charge accumulation <sup>a</sup>and vibrational frequencies<sup>b</sup> for CO<sub>2</sub> adsorption on the V-Pt<sub>4</sub>-TiO<sub>2</sub> structure.

| adsorption<br>config.                                                                                | E <sub>ads</sub><br>(eV) | O—C—O<br>(deg) | Δe of CO <sub>2</sub> |       |       | Sum <i>e</i> (CO <sub>2</sub> ) | ν(CO <sub>2</sub> ) (cm <sup>-1</sup> ) |        |         |
|------------------------------------------------------------------------------------------------------|--------------------------|----------------|-----------------------|-------|-------|---------------------------------|-----------------------------------------|--------|---------|
|                                                                                                      |                          |                | C                     | O     | O     |                                 | ν1                                      | ν2     | ν3      |
| (i) CO <sub>2</sub> binding on the metal cluster                                                     |                          |                |                       |       |       |                                 |                                         |        |         |
| V-Pt-1                                                                                               | -0.77                    | 147.01         | -0.41                 | 0.00  | 0.11  | -0.30                           | 1139.79                                 | 636.44 | 1962.34 |
| (ii) CO <sub>2</sub> binding at the interface between metal cluster and the TiO <sub>2</sub> surface |                          |                |                       |       |       |                                 |                                         |        |         |
| V-Pt-2                                                                                               | -0.91                    | 126.04         | -0.53                 | -0.11 | 0.02  | -0.61                           | 1207.87                                 | 743.68 | 1522.55 |
| V-Pt-3                                                                                               | -0.53                    | 123.32         | -0.72                 | -0.11 | -0.02 | -0.85                           | 910.98                                  | 710.73 | 1602.41 |
| V-Pt-4                                                                                               | -0.30                    | 131.12         | -0.58                 | -0.05 | 0.04  | -0.59                           | 1168.95                                 | 742.20 | 1718.81 |
| V-Pt-5                                                                                               | -0.22                    | 127.64         | -0.54                 | -0.08 | -0.02 | -0.64                           | 1099.63                                 | 759.01 | 1709.05 |
| V-Pt-6                                                                                               | -0.22                    | 128.83         | -0.47                 | -0.08 | -0.02 | -0.57                           | 1141.42                                 | 743.30 | 1725.75 |
| (iii) linear CO <sub>2</sub> adsorbed on TiO <sub>2</sub> surface                                    |                          |                |                       |       |       |                                 |                                         |        |         |
| V-Pt-7                                                                                               | -0.22                    | 178.45         | 0.02                  | -0.03 | -0.01 | -0.02                           | 1340.58                                 | 602.35 | 2407.22 |

<sup>a</sup> Differences of Bader charge of CO<sub>2</sub> molecules between CO<sub>2</sub> adsorbed system and CO<sub>2</sub> molecule in gas-phase. Negative  $\Delta e$  means electron accumulation after the adsorption.

<sup>b</sup> Vibrational frequencies of symmetric (v1), bending (v2), and asymmetric (v3) stretching modes.

**Table S5** Calculated properties of adsorption energy, O—C—O angle, CO<sub>2</sub> charge accumulation<sup>a</sup> and vibrational frequencies<sup>b</sup> for CO<sub>2</sub> adsorption on the V-Pd<sub>4</sub>-TiO<sub>2</sub> structure.

| adsorption<br>config.                                                                                | E <sub>ads</sub><br>(eV) | O—C—O<br>(deg) | Δ <i>e</i> of CO <sub>2</sub> |       |       | Sum <i>e</i><br>(CO <sub>2</sub> ) | ν(CO <sub>2</sub> ) (cm <sup>-1</sup> ) |        |         |
|------------------------------------------------------------------------------------------------------|--------------------------|----------------|-------------------------------|-------|-------|------------------------------------|-----------------------------------------|--------|---------|
|                                                                                                      |                          |                | C                             | O     | O     |                                    | ν1                                      | ν2     | ν3      |
| (i) CO <sub>2</sub> binding on the metal cluster                                                     |                          |                |                               |       |       |                                    |                                         |        |         |
| V-Pd-1                                                                                               | -0.33                    | 143.43         | -0.38                         | -0.07 | 0.02  | -0.42                              | 1193.34                                 | 641.13 | 1862.60 |
| (ii) CO <sub>2</sub> binding at the interface between metal cluster and the TiO <sub>2</sub> surface |                          |                |                               |       |       |                                    |                                         |        |         |
| V-Pd-2                                                                                               | -0.50                    | 127.65         | -0.63                         | -0.06 | 0.01  | -0.67                              | 1043.19                                 | 709.76 | 1608.24 |
| V-Pd-3                                                                                               | -0.24                    | 126.49         | -0.66                         | -0.03 | -0.01 | -0.70                              | 1105.02                                 | 719.00 | 1605.70 |
| V-Pd-4                                                                                               | -0.16                    | 134.65         | -0.50                         | -0.09 | 0.05  | -0.54                              | 1167.47                                 | 708.98 | 1806.25 |
| (iii) linear CO <sub>2</sub> adsorbed on TiO <sub>2</sub> surface                                    |                          |                |                               |       |       |                                    |                                         |        |         |
| V-Pd-5                                                                                               | -0.14                    | 179.09         | 0.05                          | -0.04 | 0.00  | 0.01                               | 1316.40                                 | 585.31 | 2365.22 |

<sup>a</sup> Differences of Bader charge of CO<sub>2</sub> molecules between CO<sub>2</sub> adsorbed system and CO<sub>2</sub> molecule in gas-phase. Negative  $\Delta e$  means electron accumulation after the adsorption.

<sup>b</sup> Vibrational frequencies of symmetric (v1), bending (v2), and asymmetric (v3) stretching modes.

**Table S6** Calculated properties of adsorption energy, O—C—O angle, CO<sub>2</sub> charge accumulation <sup>a</sup> and vibrational frequencies<sup>b</sup> for CO<sub>2</sub> adsorption on the V-Ni<sub>4</sub>-TiO<sub>2</sub> structure.

| adsorption<br>config.                                                                                | E <sub>ads</sub><br>(eV) | O—C—O<br>(deg) | Δe of CO <sub>2</sub> |       |       | Sum <i>e</i><br>(CO <sub>2</sub> ) | ν(CO <sub>2</sub> ) (cm <sup>-1</sup> ) |        |         |
|------------------------------------------------------------------------------------------------------|--------------------------|----------------|-----------------------|-------|-------|------------------------------------|-----------------------------------------|--------|---------|
|                                                                                                      |                          |                | C                     | O     | O     |                                    | ν1                                      | ν2     | ν3      |
| (i) CO <sub>2</sub> binding on the metal cluster                                                     |                          |                |                       |       |       |                                    |                                         |        |         |
| V-Ni-1                                                                                               | -0.89                    | 140.86         | -0.58                 | -0.05 | 0.03  | -0.60                              | 1178.89                                 | 700.70 | 1779.26 |
| V-Ni-2                                                                                               | -0.65                    | 133.52         | -0.58                 | 0.01  | -0.02 | -0.60                              | 1108.97                                 | 696.35 | 1724.51 |
| (ii) CO <sub>2</sub> binding at the interface between metal cluster and the TiO <sub>2</sub> surface |                          |                |                       |       |       |                                    |                                         |        |         |
| V-Ni-3                                                                                               | -1.33                    | 125.64         | -0.73                 | 0.01  | -0.06 | -0.78                              | 1187.25                                 | 739.31 | 1501.12 |
| V-Ni-4                                                                                               | -0.80                    | 143.06         | -0.48                 | 0.04  | -0.09 | -0.53                              | 1190.11                                 | 690.47 | 1843.87 |
| V-Ni-5                                                                                               | -0.70                    | 130.34         | -0.88                 | 0.01  | -0.03 | -0.90                              | 1063.47                                 | 691.32 | 1498.88 |
| (iii) linear CO <sub>2</sub> adsorbed on TiO <sub>2</sub> surface                                    |                          |                |                       |       |       |                                    |                                         |        |         |
| V-Ni-6                                                                                               | -0.26                    | 178.16         | 0.05                  | 0.02  | -0.07 | -0.01                              | 1327.14                                 | 591.97 | 2376.79 |

<sup>a</sup> Differences of Bader charge of CO<sub>2</sub> molecules between CO<sub>2</sub> adsorbed system and CO<sub>2</sub> molecule in gas-phase. Negative  $\Delta e$  means electron accumulation after the adsorption.

<sup>b</sup> Vibrational frequencies of symmetric (v1), bending (v2), and asymmetric (v3) stretching modes.

**Table S7** Calculated properties of adsorption energy, O—C—O angle, CO<sub>2</sub> charge accumulation<sup>a</sup> and vibrational frequencies<sup>b</sup> for CO<sub>2</sub> adsorption on the V-Cu<sub>4</sub>-TiO<sub>2</sub> structure.

| adsorption<br>config.                                                                                | E <sub>ads</sub><br>(eV) | O—C—O<br>(deg) | Δe of CO <sub>2</sub> |       |       | Sum <i>e</i> (CO <sub>2</sub> ) | ν(CO <sub>2</sub> ) (cm <sup>-1</sup> ) |        |         |
|------------------------------------------------------------------------------------------------------|--------------------------|----------------|-----------------------|-------|-------|---------------------------------|-----------------------------------------|--------|---------|
|                                                                                                      |                          |                | C                     | O     | O     |                                 | ν1                                      | ν2     | ν3      |
| (i) CO <sub>2</sub> binding on the metal cluster                                                     |                          |                |                       |       |       |                                 |                                         |        |         |
| V-Cu-1                                                                                               | -0.47                    | 135.33         | -0.67                 | -0.01 | -0.04 | -0.71                           | 1185.94                                 | 672.04 | 1731.43 |
| V-Cu-2                                                                                               | -0.35                    | 119.56         | -0.88                 | -0.07 | -0.06 | -1.01                           | 1102.06                                 | 751.79 | 1421.23 |
| V-Cu-3                                                                                               | -0.28                    | 149.86         | -0.32                 | 0.03  | -0.05 | -0.33                           | 1224.57                                 | 557.65 | 2048.16 |
| V-Cu-4                                                                                               | -0.76                    | 123.80         | -0.74                 | -0.06 | -0.12 | -0.93                           | 1233.59                                 | 764.68 | 1471.91 |
| (ii) CO <sub>2</sub> binding at the interface between metal cluster and the TiO <sub>2</sub> surface |                          |                |                       |       |       |                                 |                                         |        |         |
| V-Cu-5                                                                                               | -0.19                    | 130.33         | -0.72                 | -0.07 | -0.02 | -0.81                           | 1127.79                                 | 683.30 | 1585.79 |
| V-Cu-6                                                                                               | -0.16                    | 125.02         | -0.71                 | -0.02 | -0.08 | -0.81                           | 1046.77                                 | 737.53 | 1664.16 |
| (iii) linear CO <sub>2</sub> adsorbed on TiO <sub>2</sub> surface                                    |                          |                |                       |       |       |                                 |                                         |        |         |
| V-Cu-7                                                                                               | -0.06                    | 179.16         | 0.02                  | 0.03  | -0.07 | -0.02                           | 1353.14                                 | 620.75 | 2429.35 |

<sup>a</sup> Differences of Bader charge of CO<sub>2</sub> molecules between CO<sub>2</sub> adsorbed system and CO<sub>2</sub> molecule in gas-phase. Negative  $\Delta e$  means electron accumulation after the adsorption.

<sup>b</sup> Vibrational frequencies of symmetric (v1), bending (v2), and asymmetric (v3) stretching modes.

**Table S8** Comparison of the photocatalysts for CO<sub>2</sub>-to-methanol conversion with this work

| Catalysts                    | Condition                                                                                                  | Methanol yield ( $\mu\text{mol g}^{-1}\text{h}^{-1}$ ) | Ref.             |
|------------------------------|------------------------------------------------------------------------------------------------------------|--------------------------------------------------------|------------------|
| 2.0% Cu/TiO <sub>2</sub>     | Hg lamp, 8W<br>CO <sub>2</sub> pressure= 1 bar<br>0.2 M NaOH as the electron donor                         | 19.75                                                  | [1]              |
| 1.2 wt.% Cu/TiO <sub>2</sub> | 365 nm Hg lamp, 16W<br>pressure= 1.29 bar<br>H <sub>2</sub> O as the electron donor                        | 0.45                                                   | [2]              |
| L-C/Z                        | Xe lamp, 450W<br>H <sub>2</sub> O as the electron donor                                                    | 6.78                                                   | [3]              |
| Fe-N-Ti@50CPO                | Hg lamp, 70 W<br>CO <sub>2</sub> pressure= 0.758 bar<br>H <sub>2</sub> O as the electron donor             | 2.17                                                   | [4]              |
| Cu-TiO <sub>2</sub> /ZSM-5   | A 254 nm UV-lamp, 14 W<br>0.1 M NaHCO <sub>3</sub> as the electron donor                                   | 50.05                                                  | [5]              |
| ZnO                          | Xenon lamp, 300W<br>1 M NaOH as the electron donor                                                         | 17.45                                                  | [6]              |
| P25                          | Xe lamp, 500W<br>0.05 M NaOH as the electron donor                                                         | 33.22                                                  | [7]              |
| Pt-TiO <sub>2</sub>          | <b>UV-light (Hg-125W)</b><br><b>CO<sub>2</sub> pressure= 1 atm</b><br><b>No electron donors/scavengers</b> | <b>17.85</b>                                           | <b>This work</b> |

1. Tseng, I-H; Chang, W-C; Wu, J. C. S. Photoreduction of CO<sub>2</sub> using sol-gel derived titania and titania-supported copper catalysts. *Appl. Catal. B: Environ.* **2002**, 37, 37–48.
2. Wu, J.C.; Lin, H.-M.; Lai, C.-L., Photo reduction of CO<sub>2</sub> to methanol using optical-fiber photoreactor. **2005**, 296)2, 194-200.
3. Guo, Q.; Zhang, Q.; Wang, H.; Liu, Z.; Zhao, Z., Unraveling the role of surface property in the photoreduction performance of CO<sub>2</sub> and H<sub>2</sub>O catalyzed by the modified ZnO. *Mol. Catal.* **2017**, 436, 19-28.
4. Shariati, A., Fe-N-TiO<sub>2</sub>/CPO-Cu-27 nanocomposite for superior CO<sub>2</sub> photoreduction performance under visible light irradiation. *Solar Energy* **2019**, 186, 166-174.
5. Wang, J.-J.; Jing, Y.-H.; Ouyang, T.; Zhang, Q.; Chang, C.-T., Photocatalytic reduction of CO<sub>2</sub> to energy products using Cu-TiO<sub>2</sub>/ZSM-5 and Co-TiO<sub>2</sub>/ZSM-5 under low energy irradiation. *Catal. Commun.* **2015**, 59, 69-72.
6. Zhang, L.; Li, N.; Jiu, H.; Qi, G.; Huang, Y., ZnO-reduced graphene oxide nanocomposites as efficient photocatalysts for photocatalytic reduction of CO<sub>2</sub>. *Ceram. Int.* **2015**, 41) 5, 6256-6262.
7. Song, Y.; Li, J.; Wang, C., Modification of porphyrin/dipyridine metal complexes on the surface of TiO<sub>2</sub> nanotubes with enhanced photocatalytic activity for photoreduction of CO<sub>2</sub> into methanol. *J. Mater. Res.* **2018**, 33 (17), 2612-2620.

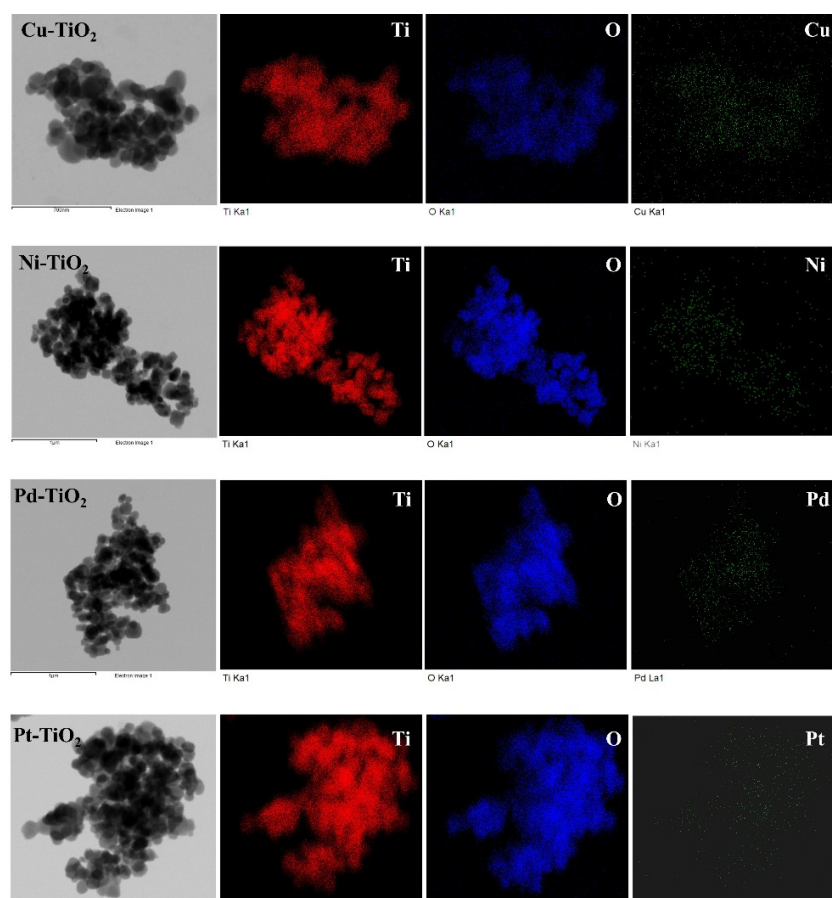

**Figure S1** TEM-EDS result of photocatalysts.

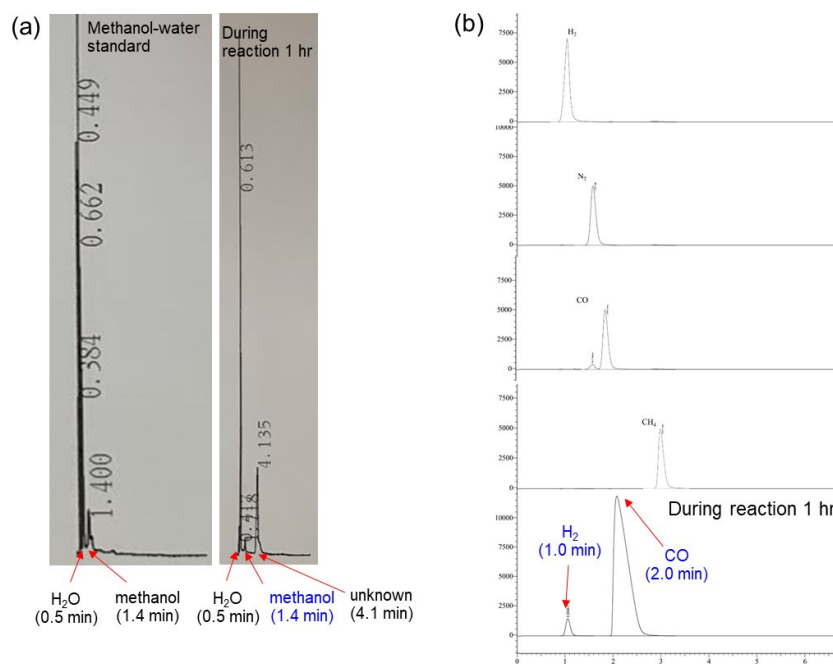

**Figure S2** (a) GC-FID profile of the liquid products (b) GC-TCD profile of the gaseous products produced during the reaction.

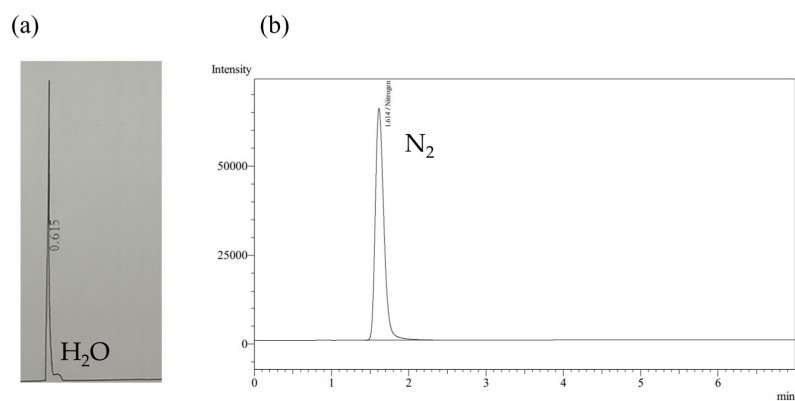

**Figure S3** (a) GC-FID profile of the products (b) GC-TCD profile of the gaseous products produced during the reaction without involvement of CO<sub>2</sub> as reactant.

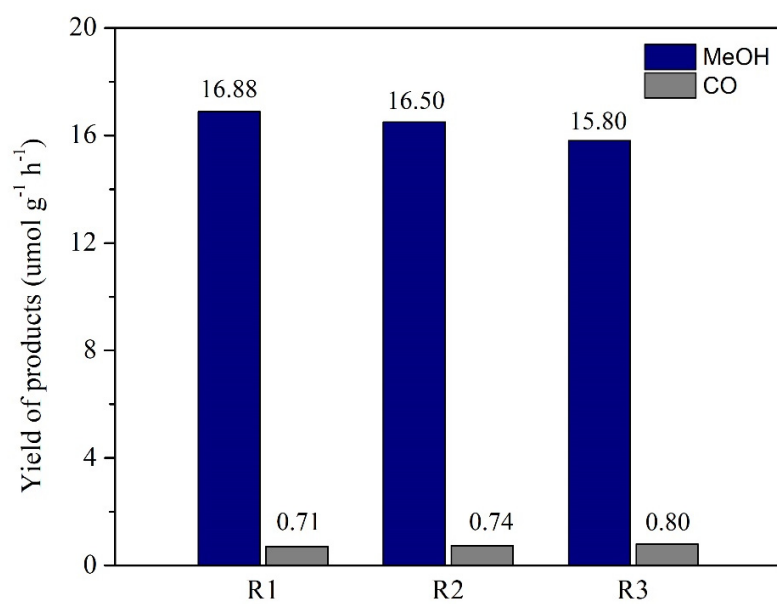

**Figure S4** CO<sub>2</sub> photoreduction of the reuse catalyst of 0.1 wt% Pt-TiO<sub>2</sub>.

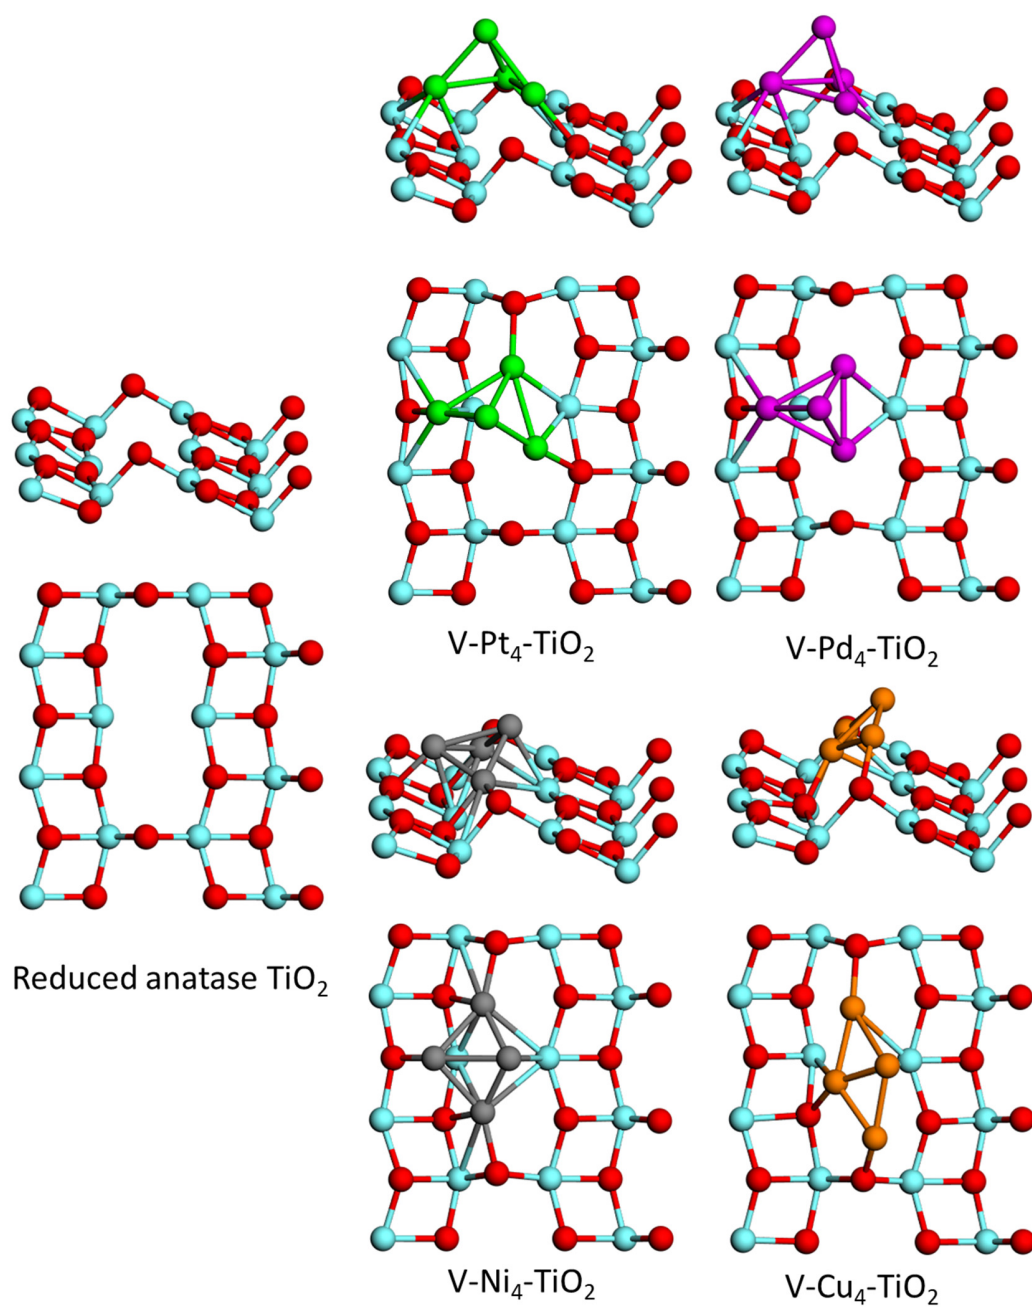

**Figure S5** The geometry of reduced anatase  $\text{TiO}_2$ , and the most stable configurations of tetramer metal cluster adsorbed on reduced anatase  $\text{TiO}_2$ . (Blue = Ti, Red = O, Green = Pt, Purple = Pd, Gray = Ni, and Orange = Cu)



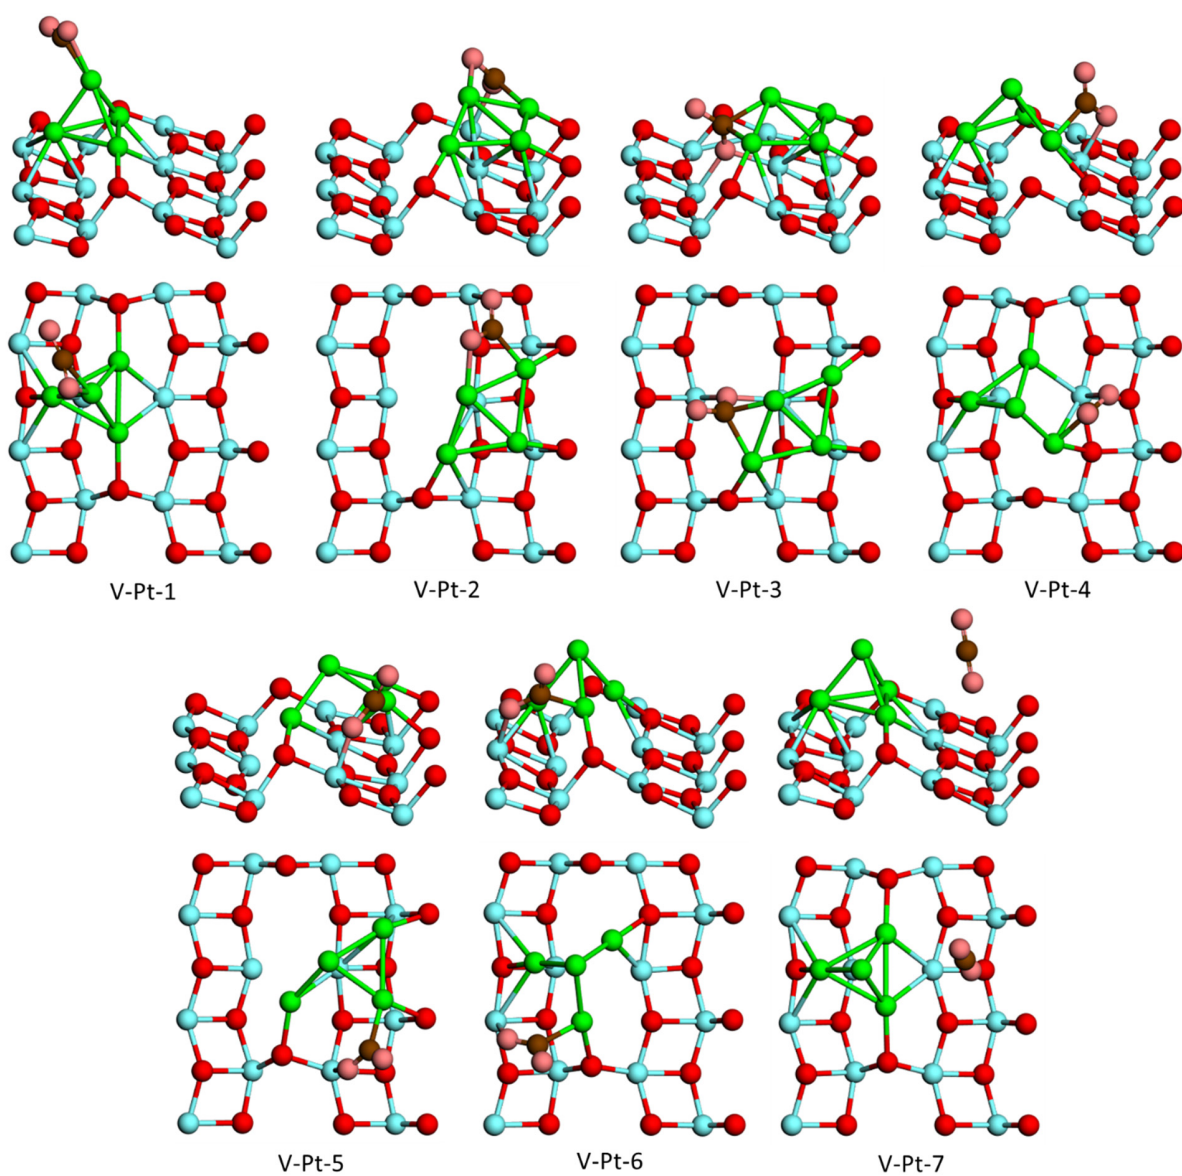

**Figure S6** The geometry of CO<sub>2</sub> adsorption configurations on the V-Pt<sub>4</sub>-TiO<sub>2</sub> structure. (Blue = Ti, Red = O, Brown = C, Pink = O of CO<sub>2</sub>, and Green = Pt)

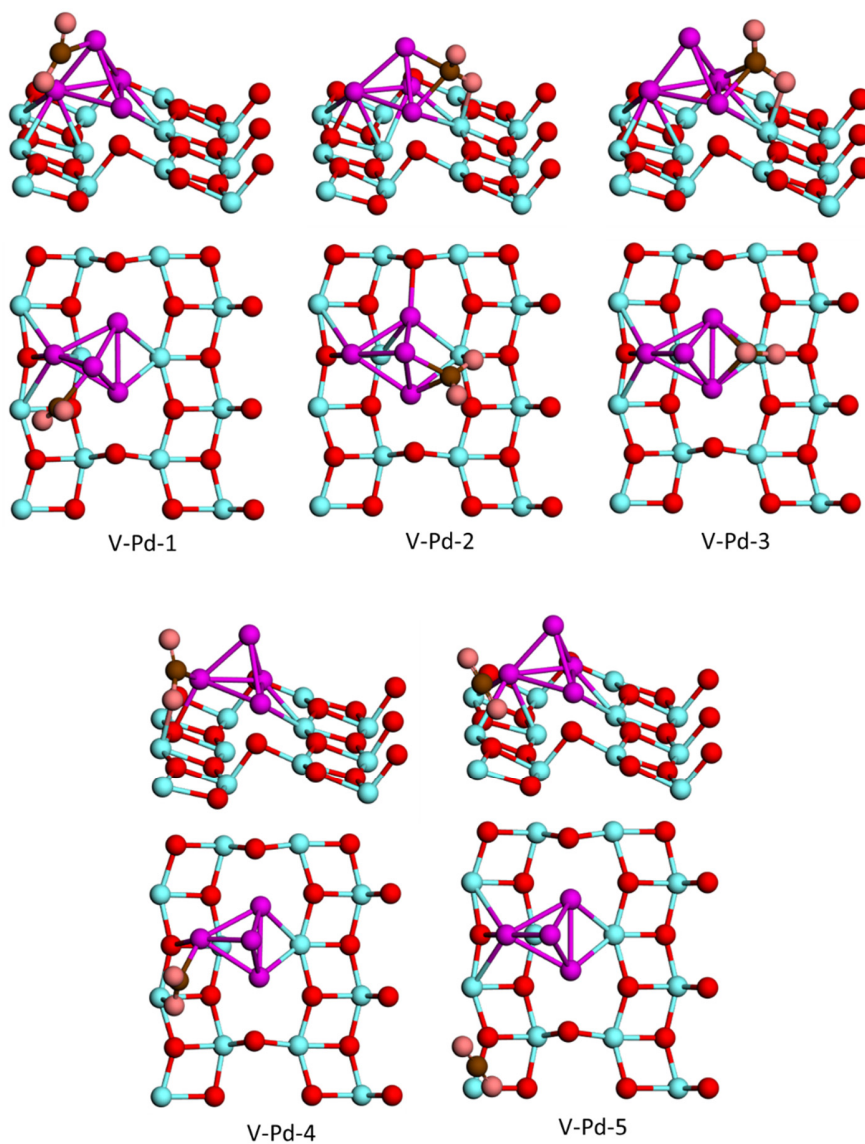

**Figure S7** The geometry of CO<sub>2</sub> adsorption configurations on the V-Pd<sub>4</sub>-TiO<sub>2</sub> structure. (Blue = Ti, Red = O, Brown = C, Pink = O of CO<sub>2</sub>, and Purple = Pd)

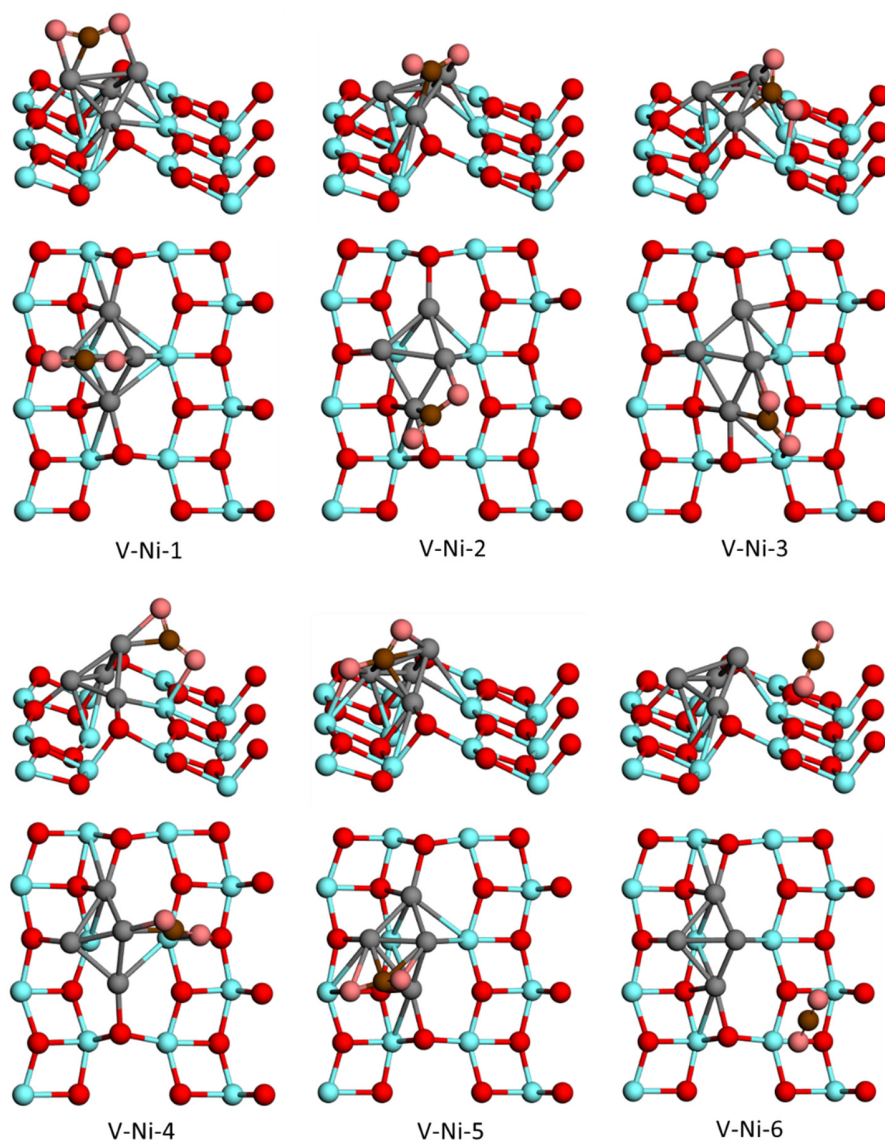

**Figure S8** The geometry of CO<sub>2</sub> adsorption configurations on the V-Ni<sub>4</sub>-TiO<sub>2</sub> structure. (Blue = Ti, Red = O, Brown = C, Pink = O of CO<sub>2</sub>, and Gray = Ni)

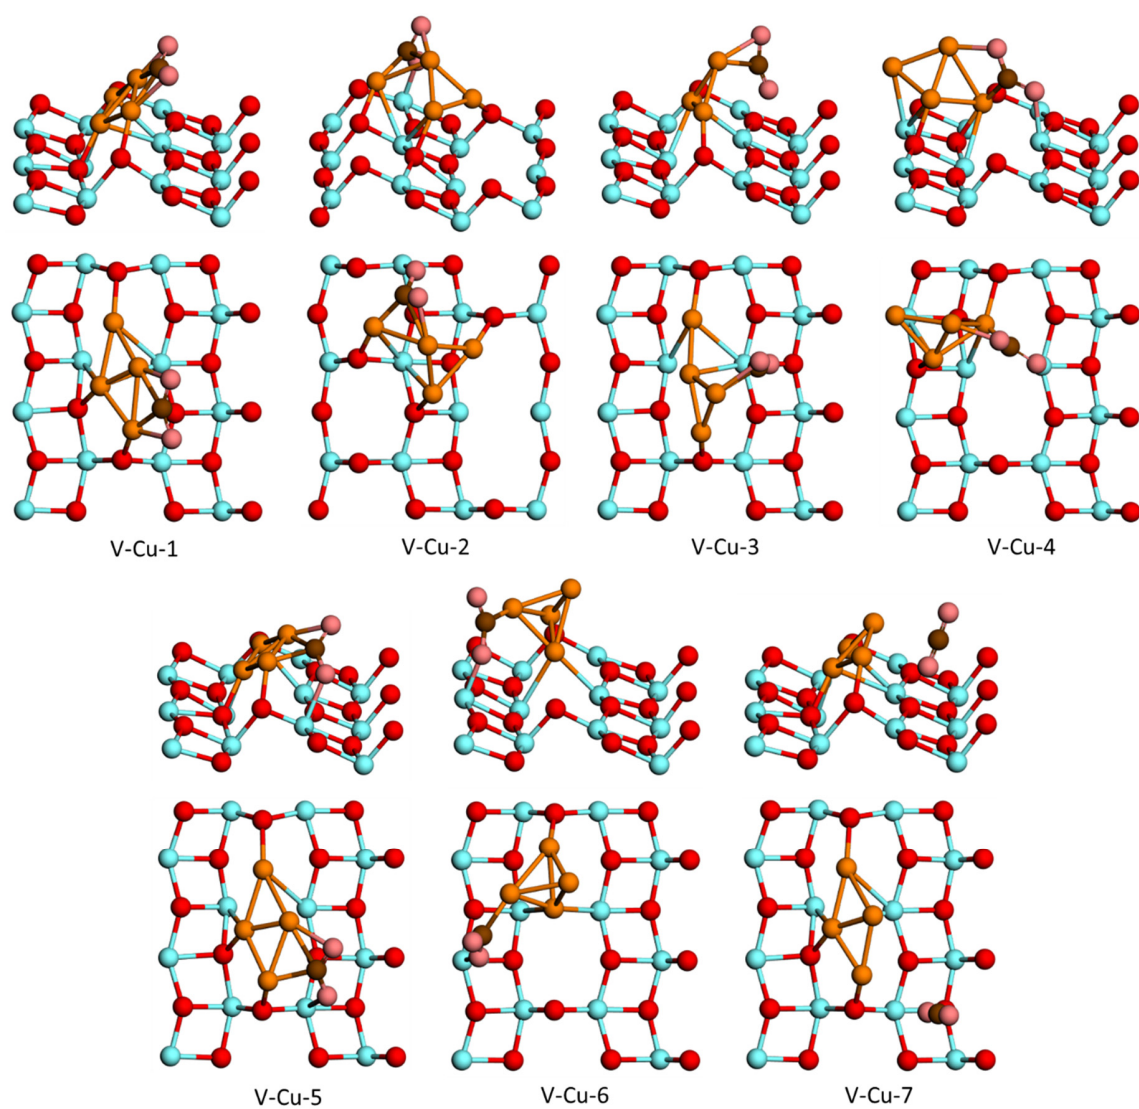

**Figure S9** The geometry of CO<sub>2</sub> adsorption configurations on the V-Cu<sub>4</sub>-TiO<sub>2</sub> structure. (Blue = Ti, Red = O, Brown = C, Pink = O of CO<sub>2</sub>, and Orange = Cu)
